# Supplementary material
Source: Springer Nature journal article supplement (https://www.springermedizin.de/resource/supplementary/13256_2012_2172_MOESM2_ESM.pdf/9649164)

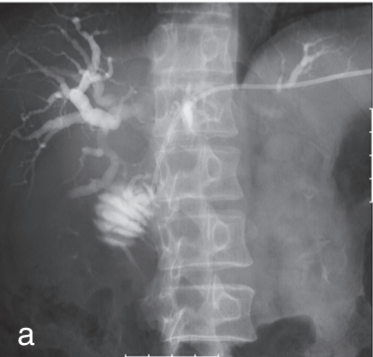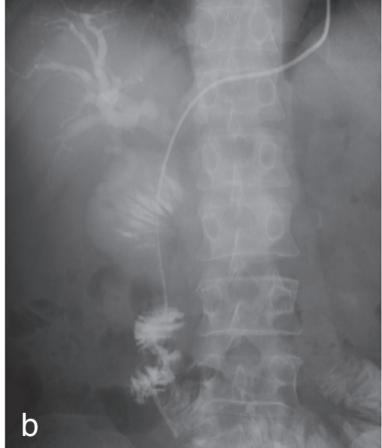

Supplement: MOESM2 [file 9649164]
